# Supplementary material
Source: PubMed Central journal article supplement (PMC5075084)
Supplement: AAC.00632-16_zac011165701so1.pdf [file AAC.00632-16_zac011165701so1.pdf]

## **Supplemental Material**

### **Pyrazinamide Resistance Assays and Two-Month Sputum Culture Status in MDR-TB Patients**

Gustavo E. Velásquez, Roger I. Calderon, Carole D. Mitnick, Mercedes C. Becerra,  
Chuan-Chin Huang, Zibiao Zhang, Carmen C. Contreras, Rosa M. Yataco, Jerome T. Galea,  
Leonid W. Lecca, Megan B. Murray

**Table S1.** List of *pncA* mutations for MDR-TB isolates, with corresponding DST results and two-month outcomes<sup>a</sup>

| <b>Mutation</b> | <b>Isolates<br/>(N = 121)</b> | <b>Wayne Method<br/>No. Resistant (%)</b> | <b>BACTEC™ MGIT™ 960<br/>No. Resistant (%)<sup>b</sup></b> | <b>Two-Month Smear<br/>No. Positive/Tested (%)</b> | <b>Two-Month Culture<br/>No. Positive/Tested (%)<sup>c</sup></b> |
|-----------------|-------------------------------|-------------------------------------------|------------------------------------------------------------|----------------------------------------------------|------------------------------------------------------------------|
| R2W             | 1                             | 0 (0.0)                                   | 0 (0.0)                                                    | 1/1 (100.0)                                        | 1/1 (100.0)                                                      |
| L4S             | 1                             | 1 (100.0)                                 | 1 (100.0)                                                  | 1/1 (100.0)                                        | 1/1 (100.0)                                                      |
| D8A             | 1                             | 1 (100.0)                                 | 1 (100.0)                                                  | 1/1 (100.0)                                        | 1/1 (100.0)                                                      |
| D8E             | 2                             | 1 (50.0)                                  | 2 (100.0)                                                  | 2/2 (100.0)                                        | 2/2 (100.0)                                                      |
| Q10R            | 19                            | 16 (84.2)                                 | 17 (89.5)                                                  | 13/19 (68.4)                                       | 17/19 (89.5)                                                     |
| A46E            | 1                             | 1 (100.0)                                 | 0 (0.0)                                                    | 1/1 (100.0)                                        | 1/1 (100.0)                                                      |
| K48T            | 1                             | 0 (0.0)                                   | 1 (100.0)                                                  | 1/1 (100.0)                                        | 1/1 (100.0)                                                      |
| indel 48        | 1                             | 1 (100.0)                                 | 1 (100.0)                                                  | 1/1 (100.0)                                        | 1/1 (100.0)                                                      |
| D49N            | 3                             | 2 (66.7)                                  | 2 (66.7)                                                   | 1/3 (33.3)                                         | 2/3 (66.7)                                                       |
| H51R            | 13                            | 10 (76.9)                                 | 12 (92.3)                                                  | 6/13 (46.2)                                        | 9/12 (75.0)                                                      |
| H57L            | 3                             | 3 (100.0)                                 | 2 (66.7)                                                   | 2/3 (66.7)                                         | 1/3 (33.3)                                                       |
| H57P            | 1                             | 1 (100.0)                                 | 1 (100.0)                                                  | 1/1 (100.0)                                        | 1/1 (100.0)                                                      |
| H57R            | 2                             | 1 (50.0)                                  | 2 (100.0)                                                  | 2/2 (100.0)                                        | 1/2 (50.0)                                                       |
| indel 65        | 1                             | 1 (100.0)                                 | 1 (100.0)                                                  | 1/1 (100.0)                                        | 1/1 (100.0)                                                      |
| L85P            | 1                             | 1 (100.0)                                 | 1 (100.0)                                                  | 1/1 (100.0)                                        | 1/1 (100.0)                                                      |
| indel 98        | 1                             | 1 (100.0)                                 | 1 (100.0)                                                  | 1/1 (100.0)                                        | 1/1 (100.0)                                                      |
| indel 130       | 1                             | 0 (0.0)                                   | 1 (100.0)                                                  | 0/1 (0.0)                                          | 0/1 (0.0)                                                        |
| V131G           | 2                             | 1 (50.0)                                  | 2 (100.0)                                                  | 1/2 (50.0)                                         | 1/1 (100.0)                                                      |
| T135A/P54L      | 1                             | 1 (100.0)                                 | 1 (100.0)                                                  | 1/1 (100.0)                                        | 1/1 (100.0)                                                      |
| T135P           | 1                             | 1 (100.0)                                 | 1 (100.0)                                                  | 1/1 (100.0)                                        | 1/1 (100.0)                                                      |
| D136Y           | 1                             | 0 (0.0)                                   | 0 (0.0)                                                    | 1/1 (100.0)                                        | 1/1 (100.0)                                                      |
| V139A           | 1                             | 1 (100.0)                                 | 1 (100.0)                                                  | 1/1 (100.0)                                        | 1/1 (100.0)                                                      |
| R140P           | 2                             | 2 (100.0)                                 | 2 (100.0)                                                  | 1/2 (50.0)                                         | 2/2 (100.0)                                                      |
| L159R           | 1                             | 1 (100.0)                                 | 1 (100.0)                                                  | 1/1 (100.0)                                        | 1/1 (100.0)                                                      |
| L159V           | 1                             | 0 (0.0)                                   | 0 (0.0)                                                    | 0/1 (0.0)                                          | 0/1 (0.0)                                                        |
| T160P           | 1                             | 1 (100.0)                                 | 1 (100.0)                                                  | 0/1 (0.0)                                          | 1/1 (100.0)                                                      |
| indel 170       | 1                             | 0 (0.0)                                   | 1 (100.0)                                                  | 0/1 (0.0)                                          | 1/1 (100.0)                                                      |

| <b>Mutation</b> | <b>Isolates<br/>(N = 121)</b> | <b>Wayne Method<br/>No. Resistant (%)</b> | <b>BACTEC™ MGIT™ 960<br/>No. Resistant (%)<sup>b</sup></b> | <b>Two-Month Smear<br/>No. Positive/Tested (%)</b> | <b>Two-Month Culture<br/>No. Positive/Tested (%)<sup>c</sup></b> |
|-----------------|-------------------------------|-------------------------------------------|------------------------------------------------------------|----------------------------------------------------|------------------------------------------------------------------|
| A171T           | 1                             | 0 (0.0)                                   | 1 (100.0)                                                  | 1/1 (100.0)                                        | 1/1 (100.0)                                                      |
| V180F           | 2                             | 1 (50.0)                                  | 2 (100.0)                                                  | 2/2 (100.0)                                        | 2/2 (100.0)                                                      |
| STOP187W        | 1                             | 1 (100.0)                                 | 1 (100.0)                                                  | 0/1 (0.0)                                          | 0/1 (0.0)                                                        |
| Any Mutation    | 69                            | 51 (73.9)                                 | 60 (87.0)                                                  | 46/69 (66.7)                                       | 55/67 (82.1)                                                     |
| Wild type       | 52                            | 9 (17.3)                                  | 11 (21.2)                                                  | 25/52 (48.1)                                       | 32/49 (65.3)                                                     |
| <b>Total</b>    | <b>121</b>                    | <b>60 (49.6)</b>                          | <b>71 (58.7)</b>                                           | <b>71/121 (58.7)</b>                               | <b>87/116 (75.0)</b>                                             |

<sup>a</sup> DST, drug susceptibility testing; MDR-TB, multidrug-resistant tuberculosis; MGIT, mycobacteria growth indicator tube; MIC, minimum inhibitory concentration.

<sup>b</sup> The DST results shown use a BACTEC™ MGIT™ 960 method MIC >100 mg/L to indicate resistance to pyrazinamide.

<sup>c</sup> Two (1.7%) patients had a missing two-month culture result due to a contaminated sample, and three (2.5%) patients for an unknown reason.

**Table S2.** PZA resistance assay test characteristics among 55 EMB-resistant MDR-TB patients, using a consensus gold standard derived from a LCA model as the comparator<sup>a</sup>

| <b>PZA resistance assay</b> | <b>Sensitivity<br/>% (95% CI)</b> | <b>Specificity<br/>% (95% CI)</b> | <b>AUC of ROC<br/>(95% CI)</b> |
|-----------------------------|-----------------------------------|-----------------------------------|--------------------------------|
| Wayne method                | 79.5 (63.5-90.7)                  | 100.0 (79.4-100.0)                | 0.90 (0.83-0.96)               |
| BACTEC™ MGIT™ 960           | 94.9 (82.7-99.4)                  | 87.5 (61.7-98.4)                  | 0.91 (0.82-1.00)               |
| <i>pncA</i> sequencing      | 97.4 (86.5-99.9)                  | 75.0 (47.6-92.7)                  | 0.86 (0.75-0.97)               |

<sup>a</sup> AUC, area under the curve; CI, confidence interval; EMB, ethambutol; LCA, latent class analysis; MDR-TB, multidrug-resistant tuberculosis; MGIT, mycobacteria growth indicator tube; PZA, pyrazinamide; ROC, receiver operating characteristic.

**Table S3.** Univariate predictors of two-month culture positivity among unsuspected EMB-resistant MDR-TB patients receiving standard first-line antituberculous therapy<sup>a</sup>

| Variable                                | Two-month culture ( <i>n</i> = 54) <sup>b</sup> |                                |
|-----------------------------------------|-------------------------------------------------|--------------------------------|
|                                         | No. (%) <sup>c</sup>                            | Crude OR (95% CI) <sup>d</sup> |
| Age, yr                                 | 54 (100)                                        | 1.01 (0.96-1.07)               |
| Sex                                     |                                                 |                                |
| Female                                  | 21 (38.9)                                       | 1.70 (0.30-9.67)               |
| Male                                    | 33 (61.1)                                       | Reference                      |
| Smoking                                 |                                                 |                                |
| Yes                                     | 0 (0)                                           | N/A                            |
| No                                      | 53 (98.1)                                       | Reference                      |
| Unknown                                 | 1 (1.9)                                         | N/A                            |
| Alcohol use                             |                                                 |                                |
| Yes                                     | 21 (38.9)                                       | 0.89 (0.18-4.45)               |
| No                                      | 31 (57.4)                                       | Reference                      |
| Unknown                                 | 2 (3.7)                                         | N/A                            |
| Previous TB treatment                   |                                                 |                                |
| Yes                                     | 14 (25.9)                                       | 2.29 (0.25-20.9)               |
| No                                      | 40 (74.1)                                       | Reference                      |
| Baseline smear status                   |                                                 |                                |
| Positive                                | 48 (88.9)                                       | 1.40 (0.14-14.1)               |
| Negative                                | 6 (11.1)                                        | Reference                      |
| Cavitary disease                        |                                                 |                                |
| Yes                                     | 12 (22.2)                                       | 0.32 (0.06-1.71)               |
| No                                      | 41 (75.9)                                       | Reference                      |
| Unknown                                 | 1 (1.9)                                         | N/A                            |
| Baseline PZA resistance (Wayne)         |                                                 |                                |
| Yes                                     | 31 (57.4)                                       | <b>10.6 (1.17-95.5)</b>        |
| No                                      | 23 (42.6)                                       | Reference                      |
| Baseline PZA resistance (MGIT™)         |                                                 |                                |
| Yes                                     | 39 (72.2)                                       | <i>4.36 (0.84-22.5)</i>        |
| No                                      | 15 (27.8)                                       | Reference                      |
| Baseline PZA resistance ( <i>pncA</i> ) |                                                 |                                |
| Yes                                     | 42 (77.8)                                       | <b>6.50 (1.21-34.8)</b>        |
| No                                      | 12 (22.2)                                       | Reference                      |
| Baseline PZA resistance (Consensus)     |                                                 |                                |
| Yes                                     | 39 (72.2)                                       | <i>4.36 (0.84-22.5)</i>        |
| No                                      | 15 (27.8)                                       | Reference                      |

<sup>a</sup> CI, confidence interval; EMB, ethambutol; MDR, multidrug resistant; MGIT, mycobacteria growth indicator tube; OR, odds ratio; PZA, pyrazinamide; TB, tuberculosis.

<sup>b</sup> One (1.8%) patient had a missing two-month culture result due to a contaminated sample.

<sup>c</sup> The sample size varies across covariates due to missing data. Because of rounding, the sum of percentages may not equal 100%.

<sup>d</sup> *P* values < 0.05 are shown in bold, and *P* values ≥ 0.05 and < 0.1 are shown in italics.

**Table S4.** Multivariate comparison of two-month culture positivity among unsuspected EMB-resistant MDR-TB patients receiving standard first-line antituberculous therapy, by PZA resistance assay and the consensus gold standard<sup>a</sup>

| Variable                                | Two-month culture ( <i>n</i> = 54) <sup>b</sup><br>Adjusted OR (95% CI) <sup>c</sup> |
|-----------------------------------------|--------------------------------------------------------------------------------------|
| Baseline PZA resistance (Wayne)         |                                                                                      |
| Yes                                     | <b>12.4 (1.31-118.5)</b>                                                             |
| No                                      | Reference                                                                            |
| Baseline PZA resistance (MGIT™)         |                                                                                      |
| Yes                                     | <i>5.10 (0.89-29.2)</i>                                                              |
| No                                      | Reference                                                                            |
| Baseline PZA resistance ( <i>pncA</i> ) |                                                                                      |
| Yes                                     | <b>8.57 (1.42-51.9)</b>                                                              |
| No                                      | Reference                                                                            |
| Baseline PZA resistance (Consensus)     |                                                                                      |
| Yes                                     | <i>4.93 (0.89-27.3)</i>                                                              |
| No                                      | Reference                                                                            |

<sup>a</sup> CI, confidence interval; EMB, ethambutol; MDR-TB, multidrug-tuberculosis; MGIT, mycobacteria growth indicator tube; OR, odds ratio; PZA, pyrazinamide.

<sup>b</sup> One (1.8%) patient had a missing two-month culture result due to a contaminated sample.

<sup>c</sup> *P* values < 0.05 are shown in bold, and *P* values ≥ 0.05 and < 0.1 are shown in italics. All multivariate models are adjusted for age and sex.
